# Supplementary material for: Different Sensitivity of Macrophages to Phospholipidosis Induction by Amphiphilic Cationic Drugs
Source: PubMed Central journal article supplement (PMC7664898; doi:10.3390/ijms21218391), 2020-11-09
Supplement: ijms-21-08391-s001.pdf [file ijms-21-08391-s001.pdf]

# Different sensitivity of macrophages to phospholipidosis induction by amphiphilic cationic drugs

Kristin Öhlinger<sup>1</sup>, Markus Absenger-Novak<sup>1</sup>, Claudia Meindl<sup>1</sup>, Jennifer Ober<sup>1</sup>, Eleonore Fröhlich<sup>1,2,\*</sup>

<sup>1</sup> Medical University of Graz, Center for Medical Research, Stiftingtalstr. 24, 8010 Graz, Austria; [Kristin.oehlinger@medunigraz.at](mailto:Kristin.oehlinger@medunigraz.at); [Markus.absenger@medunigraz.at](mailto:Markus.absenger@medunigraz.at); [Claudia.meindl@klinikum-graz.at](mailto:Claudia.meindl@klinikum-graz.at); [Jennifer.ober@medunigraz.at](mailto:Jennifer.ober@medunigraz.at); [Eleonore.froehlich@medunigraz.at](mailto:Eleonore.froehlich@medunigraz.at)

<sup>2</sup> Research Center Pharmaceutical Engineering GmbH, Inffeldgasse 13, Graz, Austria

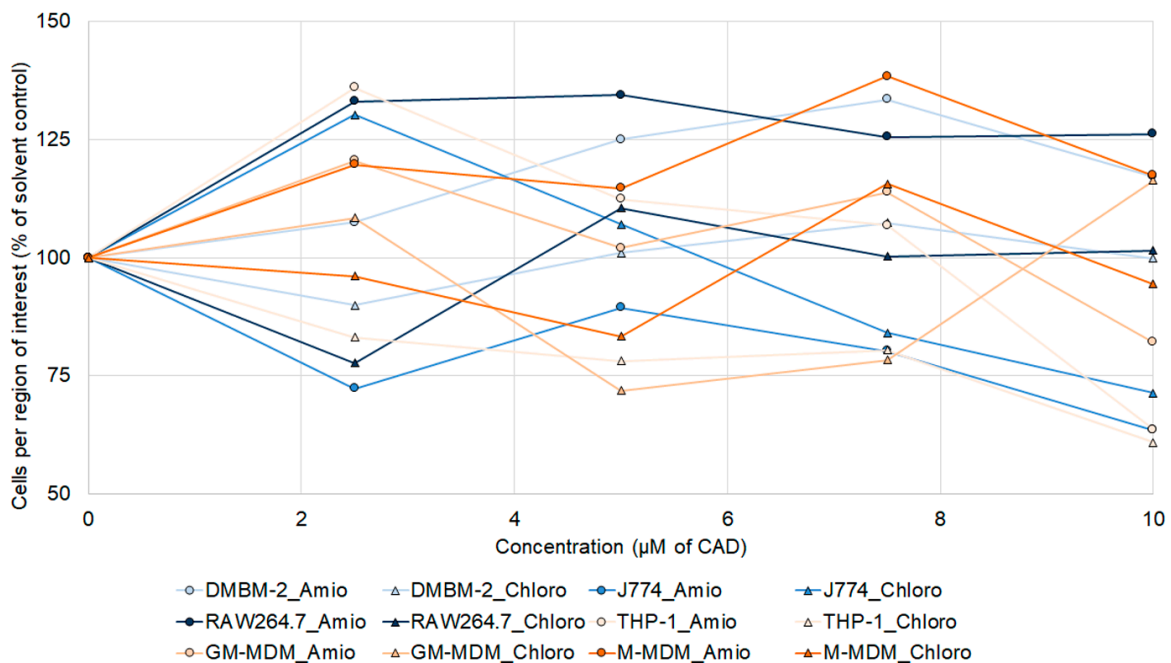

Fig. S1: Dose-dependent changes in cell density. Means (but without indication of standard deviations to increase clarity) of different areas in the culture wells are shown.

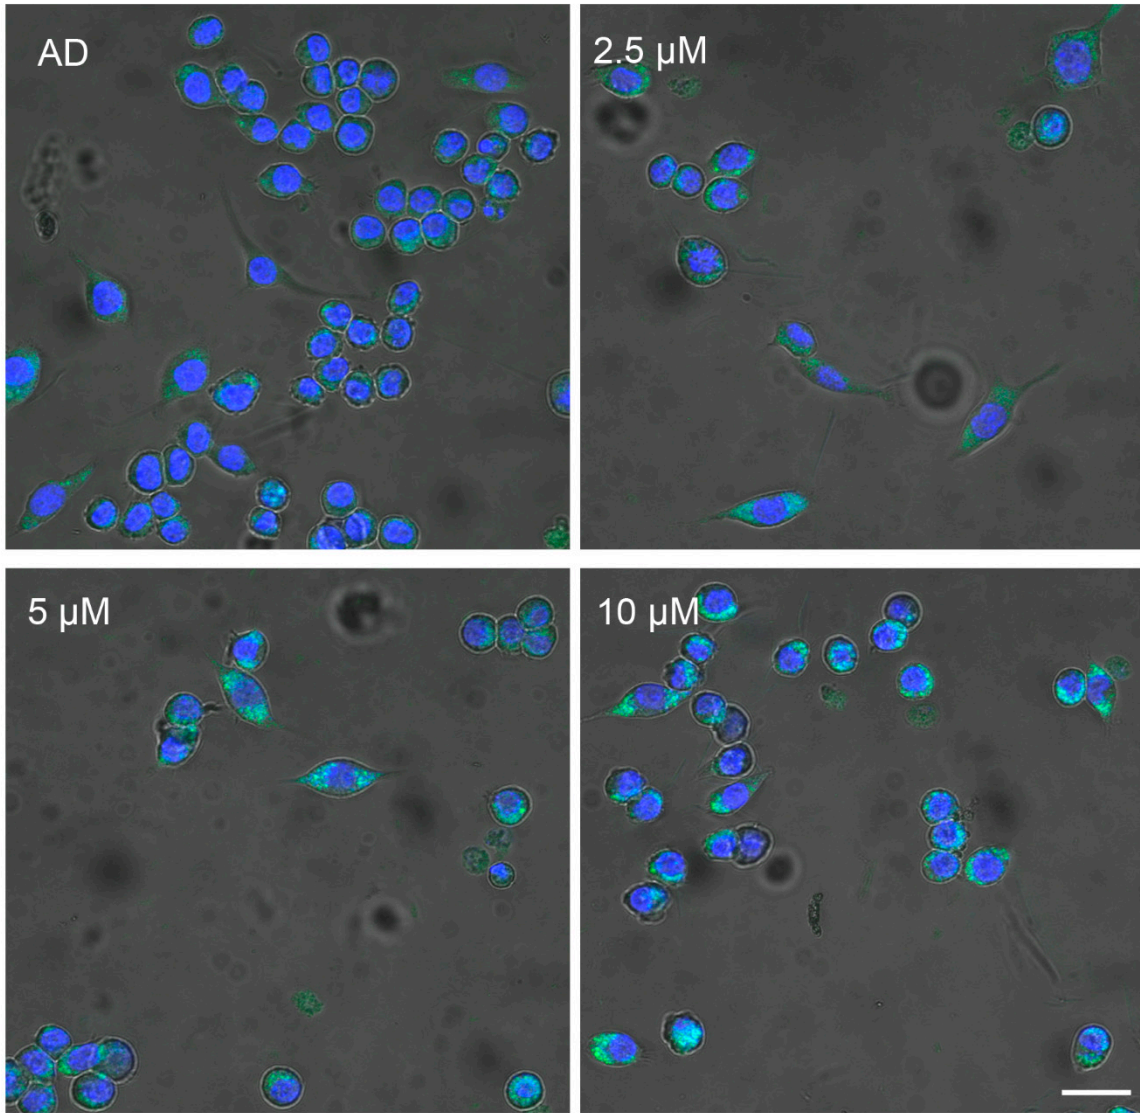

Fig. S2: RAW264.7 cells exposed to solvent control distilled water (AD) and 2.5-10  $\mu\text{M}$  Chloroquine and stained with LysoSensor dye. Scale bar 25  $\mu\text{m}$ .

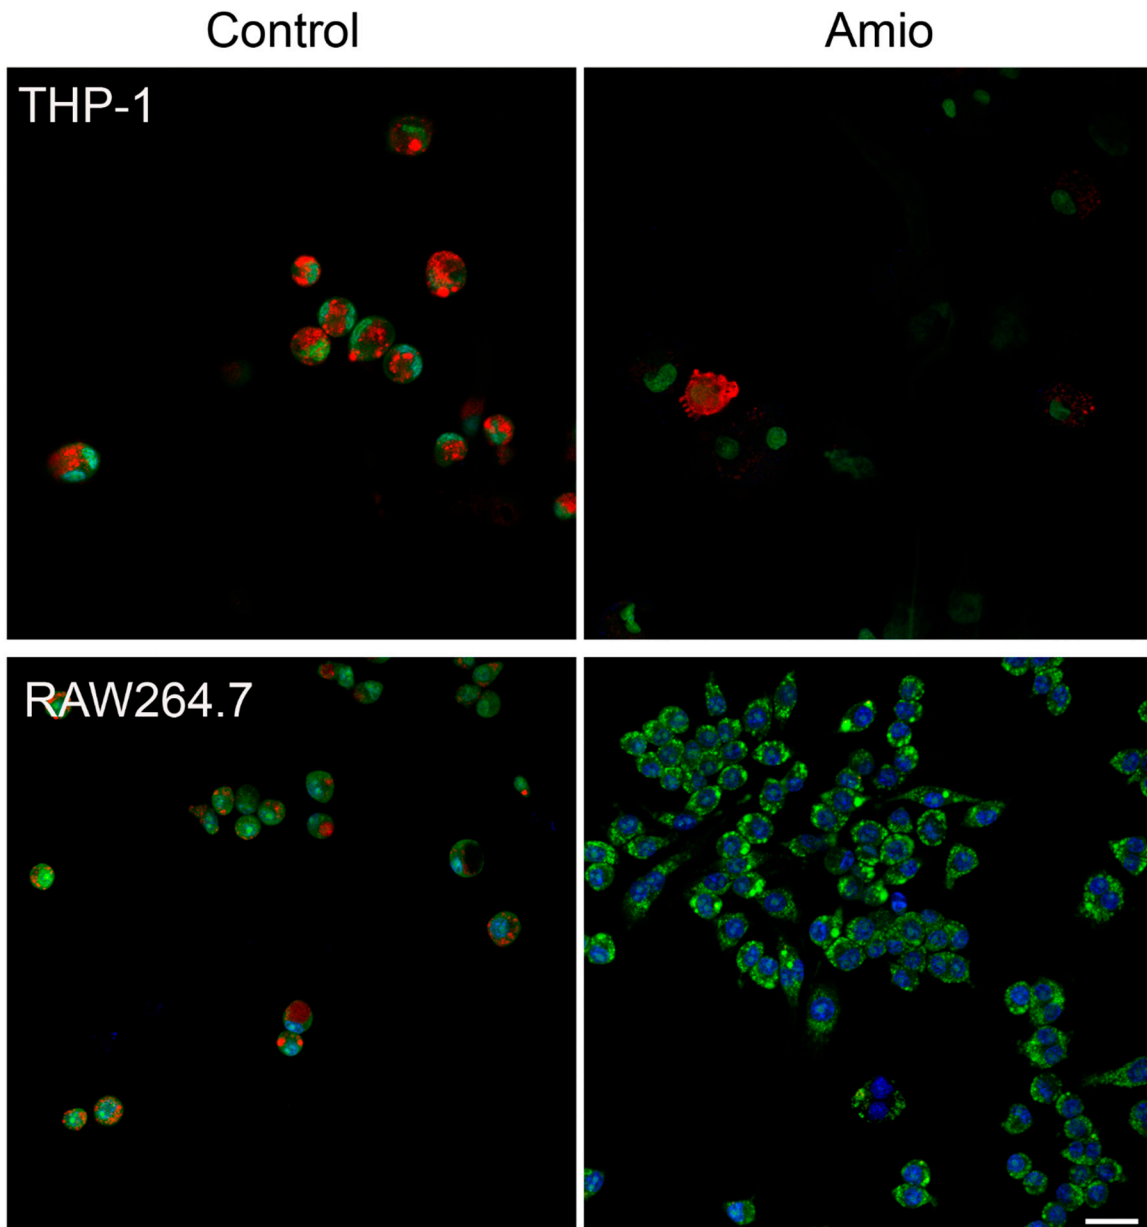

Fig. S3: THP-1 and RAW264.7 macrophages exposed to solvent control DMSO and 7.5  $\mu$ M amiodarone (Amio) and stained with Acridine Orange dye. Scale bar: 25  $\mu$ m.

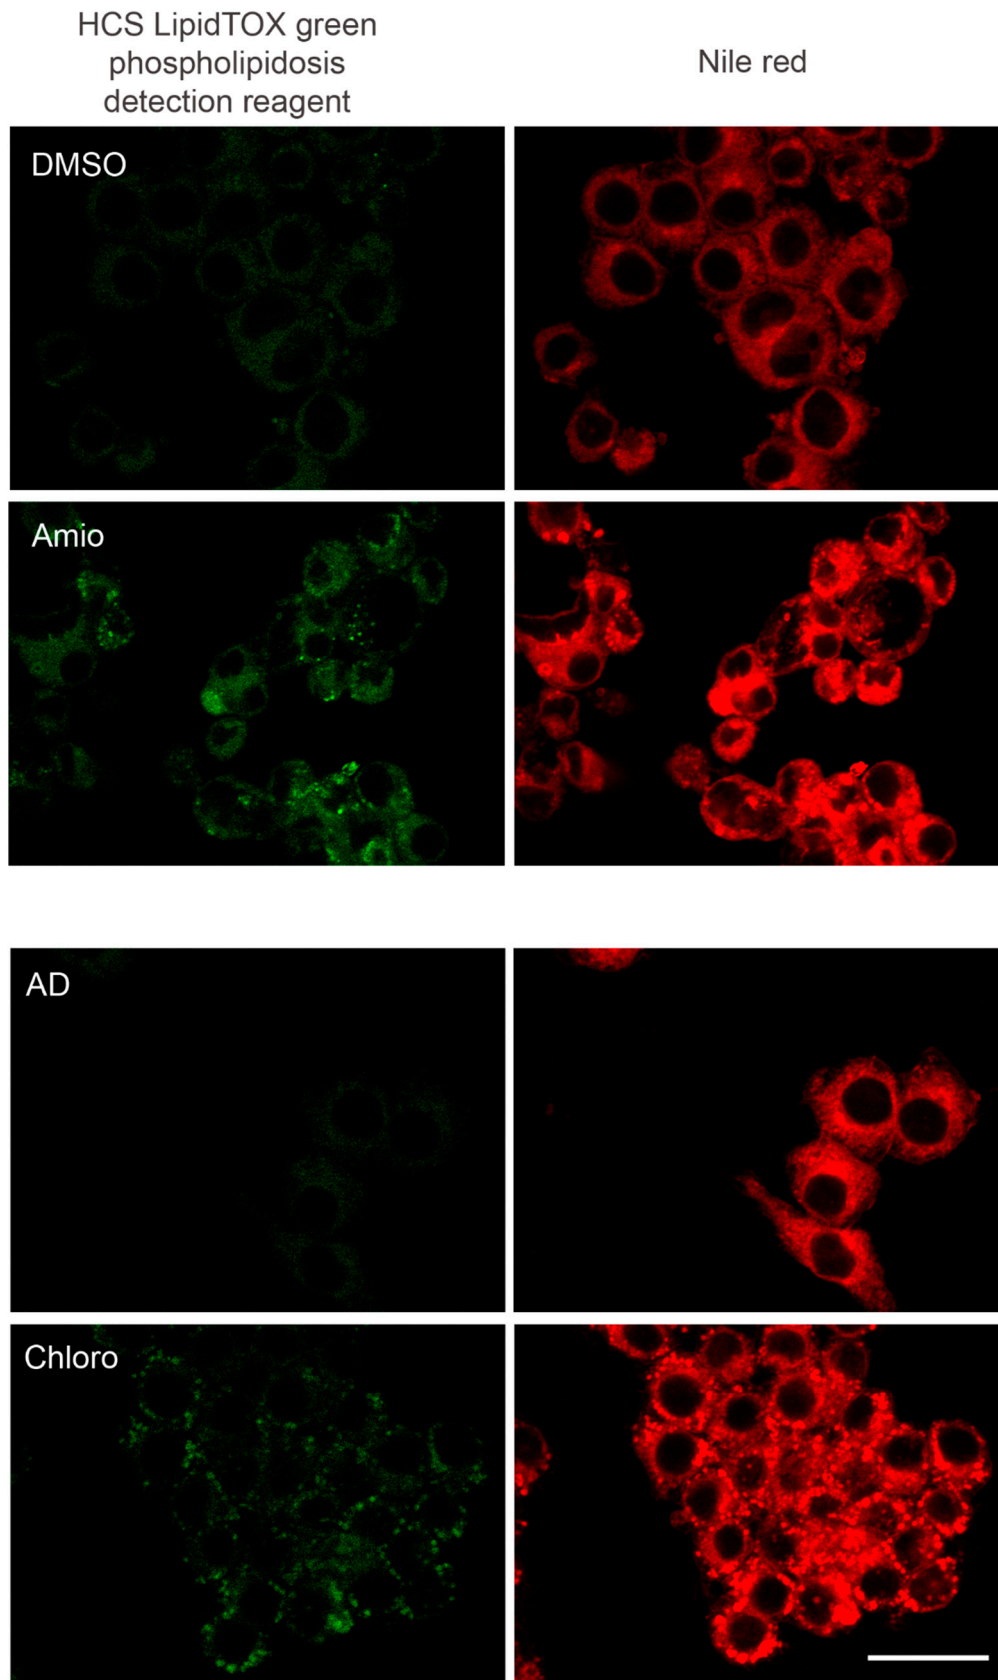

Fig. S4: Co-staining of RAW264.7 cells exposed to solvent (DMSO or AD) and Cads amiodarone (Amio) or chloroquine (Chloro) with HCS green phospholipidosis detection reagent and Nile red. Scale bar: 50  $\mu$ m.

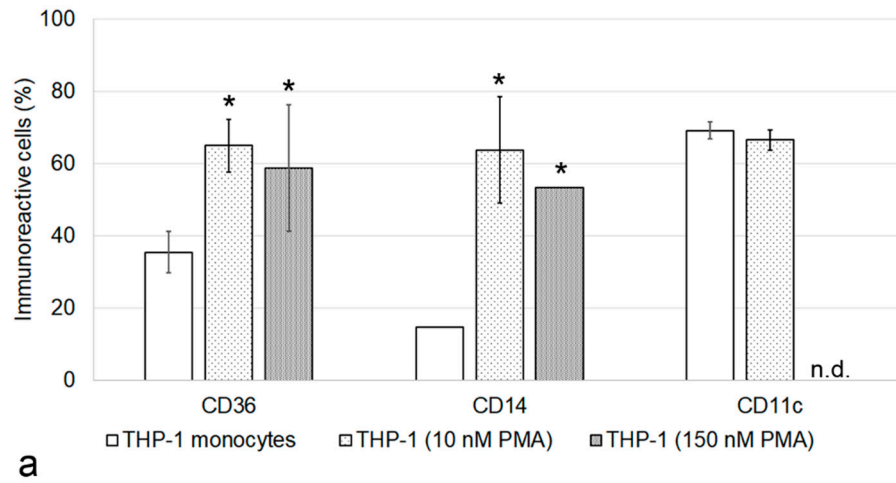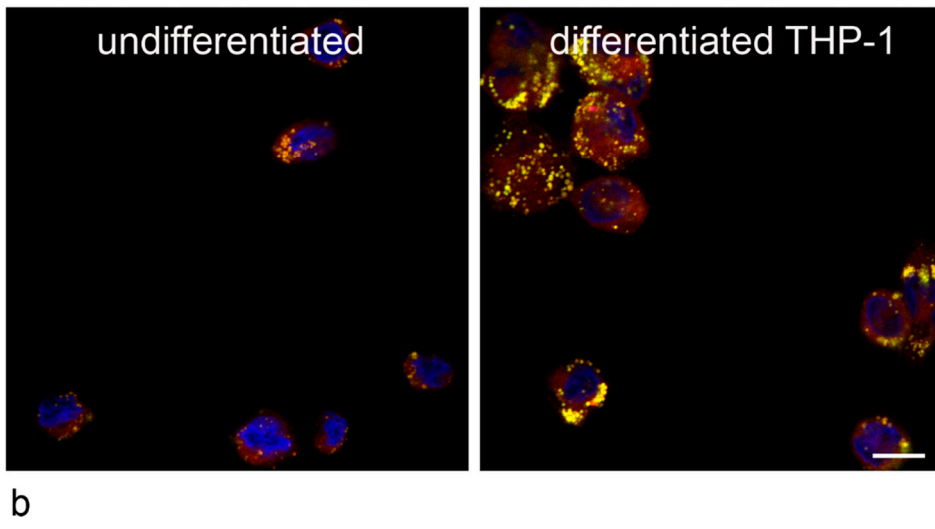

Fig. S5: Changes in CD marker expression of viable cells (a) and of (neutral and phospholipid) lipid accumulation (b) upon differentiation of THP-1 monocytes to macrophages. Scale bar: 20  $\mu$ m. Abbreviation: n.d., not determined. Differences between THP-1 monocytes and macrophages are indicated by asterisk (n=3).
